# Supplementary material for: Dissecting the Mutational Landscape of Cutaneous Melanoma: An Omic Analysis Based on Patients from Greece
Source: MDPI journal article supplement (doi:10.3390/cancers10040096), 2018-03-29
Supplement: s1 [file s1]

### Most frequently mutated Census genes from COSMIC

|        | %<br>COSMIC | P3       | P5                  | P8        | P11      | P12       | P13       | P14       | P15       |
|--------|-------------|----------|---------------------|-----------|----------|-----------|-----------|-----------|-----------|
| BRAF   | 44          | Missense | Missense            | Copy Gain |          |           |           | Missense  |           |
| LRP1B  | 26          |          |                     | Missense  |          |           | Missense  |           | Copy Loss |
| TERT   | 24          |          | Missense            |           |          |           |           |           |           |
| FAT4   | 21          |          |                     |           |          | Missense  |           |           | Missense  |
| GRIN2A | 20          |          | Missense            |           |          | Missense  | Copy Loss | Missense  |           |
| CDKN2A | 18          |          | Copy Loss           |           |          |           |           | Copy Loss | Copy Loss |
| NRAS   | 17          |          |                     |           |          |           |           |           |           |
| PTPRT  | 18          |          |                     |           |          |           |           |           |           |
| PREX2  | 16          |          |                     |           |          |           |           |           |           |
| NF1    | 16          |          |                     |           |          | Copy Loss |           |           |           |
| TP53   | 14          |          | Frameshift Deletion |           |          |           | Missense  | Copy Loss |           |
| ROS1   | 13          |          |                     |           |          | Missense  | Copy Loss |           | Copy Loss |
| TRRAP  | 13          |          |                     |           |          |           |           |           |           |
| PTPRB  | 12          |          |                     | Missense  | Missense |           |           |           |           |
| ARID2  | 12          |          |                     |           |          |           |           |           |           |
| PTPRK  | 12          |          |                     |           | Missense |           |           |           | Copy Loss |
| KMT2C  | 11          |          | Copy Gain           |           |          | Missense  |           | Missense  |           |
| ERBB4  | 11          |          |                     |           |          | Missense  |           |           |           |
| KDR    | 11          |          |                     |           |          |           |           |           | Missense  |
| PTEN   | 10          |          | Copy Loss           |           |          | Missense  |           |           | Copy Loss |

Missense  
Nonsense  
Splice Site  
Frameshift Deletion

Missense

Nonsense

Splice Site

Frameshift Deletion

Copy Loss  
Copy Gain

Copy Loss

Copy Gain

**Figure S1:** Top Census genes in melanoma from COSMIC database and the type of mutation found in all patients
